# Supplementary material for: Solid-state stability of Z′ < 1 and Z′ = 2 polymorphs of N,N,N′,N′-tetrabenzylethylenediamine: a combined experimental and theoretical study
Source: Royal Society of Chemistry journal article supplement (doi:10.1039/d2ce01174c), 2022-01-01
Supplement: d2ce01174c1.pdf [file d2ce01174c1.pdf]

## Supporting information

# Solid-state stability of $Z' < 1$ and $Z' = 2$ polymorphs of $N,N,N',N'$ -tetrabenzylethylenediamine: a combined experimental and theoretical study

Zhen Wang<sup>a</sup>, Xiaoxiao Cui<sup>a</sup>, Antonino Famulari<sup>b,c</sup>, Javier Martí-Rujas<sup>b,d\*</sup>, Benson M. Kariuki<sup>e\*</sup>, Fang Guo<sup>a\*</sup>

<sup>a</sup> College of Chemistry, Liaoning University, Shenyang, 110036, China.

E-mail: fguo@lnu.edu.cn;

<sup>b</sup> Dipartimento di Chimica Materiali e Ingegneria Chimica. “Giulio Natta”, Politecnico di Milano, Via L. Mancinelli 7, 20131 Milan, Italy.

<sup>c</sup> INSTM Consorzio Interuniversitario Nazionale per la Scienza e Tecnologia dei Materiali, 50121, Florence, Italy.

<sup>d</sup> Center for Nano Science and Technology@Polimi, Istituto Italiano di Tecnologia, Via Pascoli 70/3, 20133 Milano, Italy.

E-mail: javier.marti@polimi.it

<sup>e</sup> School of chemistry, Cardiff University, Cardiff CF10 3AT, Wales.

E-mail: KariukiB@cardiff.ac.uk

### Figure captions and tables.

**Figure S1.** (a) Experimental powder XRD patterns of **L** crystallized from methanol, with phases  $\alpha$  (black dots) and  $\beta$  (red dots) indicated. Simulated XRPD patterns of phases  $\beta$  (b) and  $\alpha$  (c).

**Figure S2.** IR spectrum of phase  $\alpha$ ,  $\beta$  and  $\gamma$ . (Red:  $\alpha/\beta$ ; Green:  $\gamma$ ).

**Figure S3.** Powder XRD recorded at different temperatures for a mixture of phases  $\alpha$  and  $\beta$ .

**Figure S4.** DSC of phase  $\alpha/\beta$ .

**Figure S5.** DSC of phase  $\gamma$ .

**Figure S6.** Powder XRD patterns for (a) DSC experiment stopped at 94 °C; (b) powder XRD simulated from single crystal data of  $\gamma$  polymorph.

**Figure S7.** ORTEP diagram of the  $\beta$  phase.

**Figure S8.** ORTEP diagram of the  $\gamma$  phase.

**Figure S9.** Electrostatic interactions in the  $\beta$  phase in dashed lines showed in Table S1.

**Table S1.** Electrostatic interactions shown in Figure S9 in the  $\beta$  polymorph.

**Figure S10.** Electrostatic interactions in the  $\gamma$  phase in dashed lines showed in Table S2.

**Table S2.** Electrostatic interactions in the  $\gamma$  polymorph shown in Figure S10.

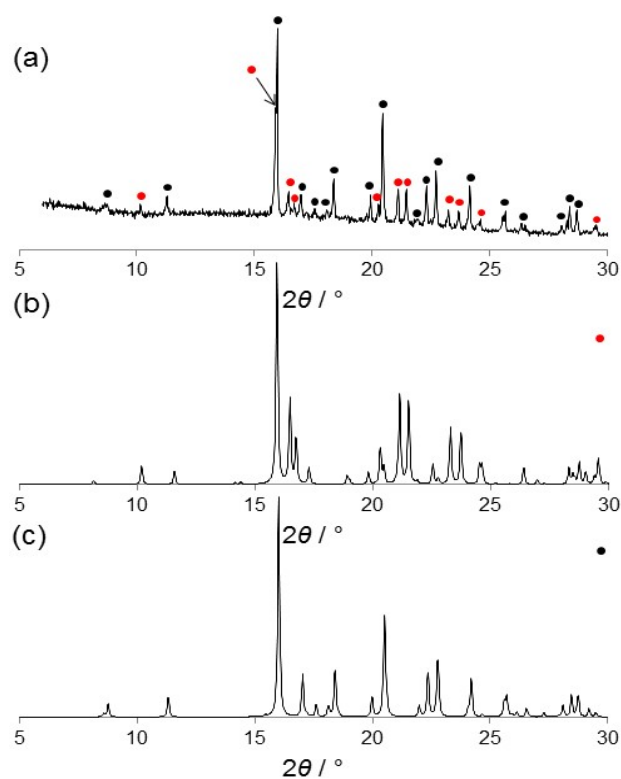

**Figure S1.** (a) Experimental powder XRD patterns of **L** crystallized from methanol, with phases  $\alpha$  (black dots) and  $\beta$  (red dots) indicated. Simulated XRPD patterns of phases  $\beta$  (b) and  $\alpha$  (c).

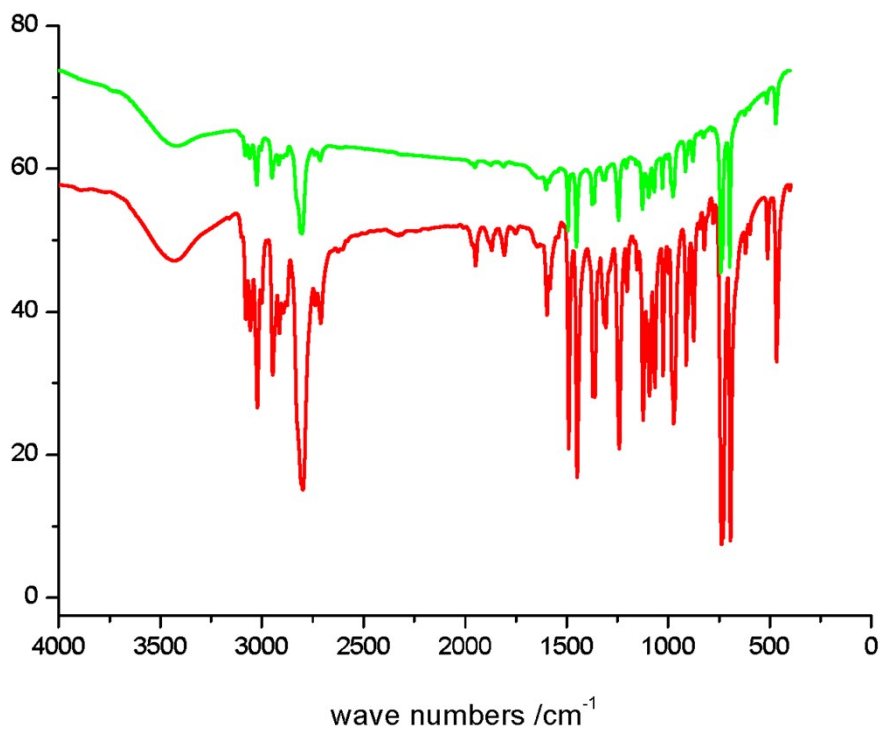

**Figure S2.** IR spectrum of phase  $\alpha$ ,  $\beta$  and  $\gamma$ . (Red:  $\alpha/\beta$ ; Green:  $\gamma$ ).

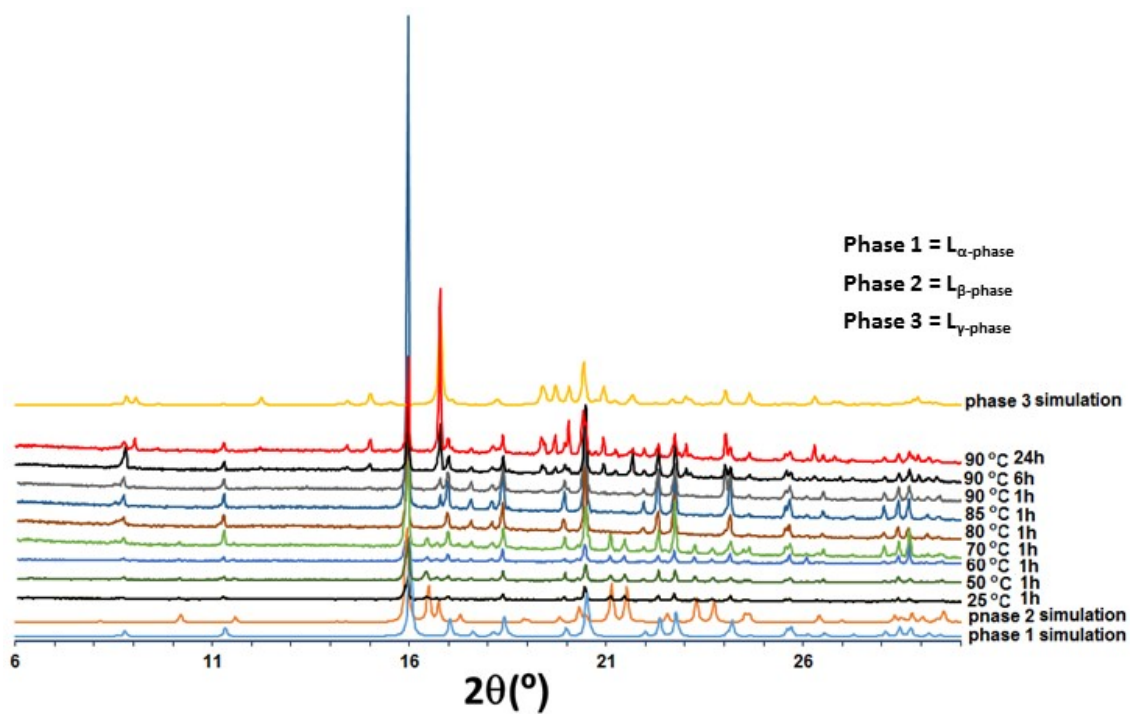

**Figure S3.** Powder XRD recorded at different temperatures for a mixture of phases  $\alpha$  and  $\beta$ .

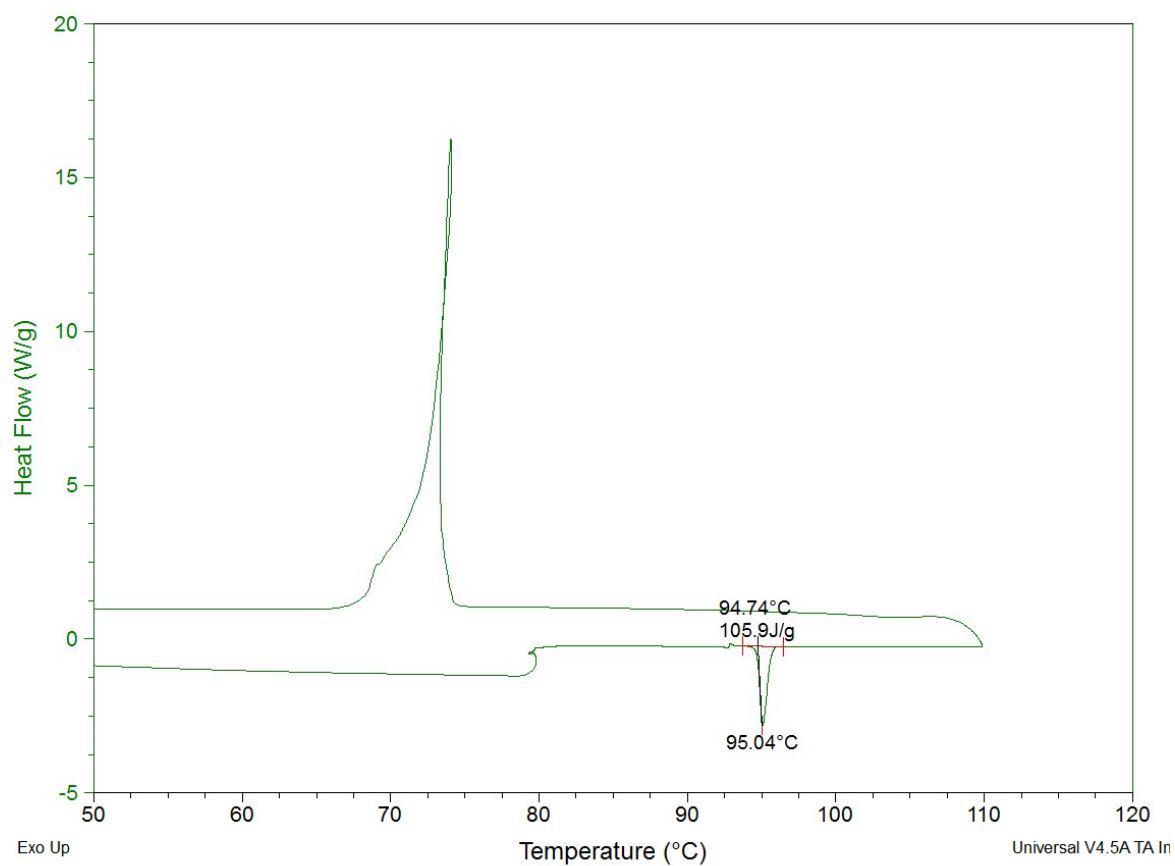

**Figure S4.** DSC of phase  $\alpha/\beta$ .

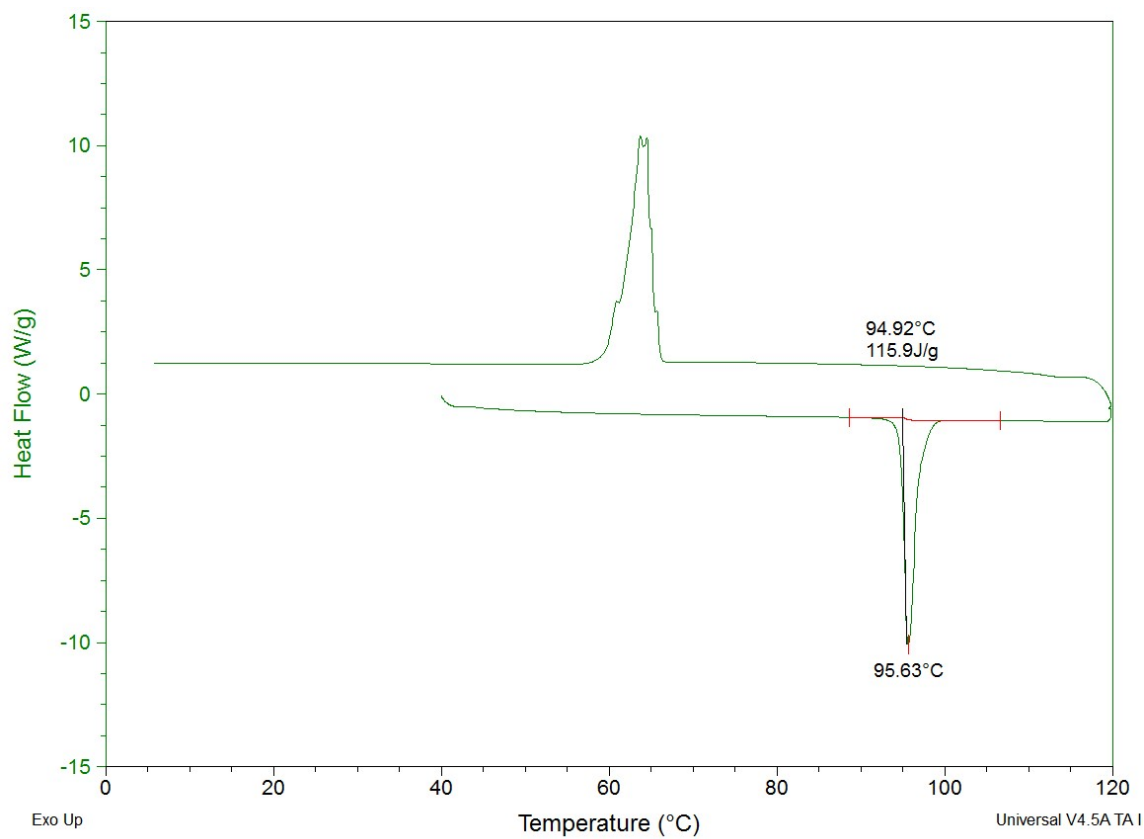

**Figure S5.** DSC of phase  $\gamma$ .

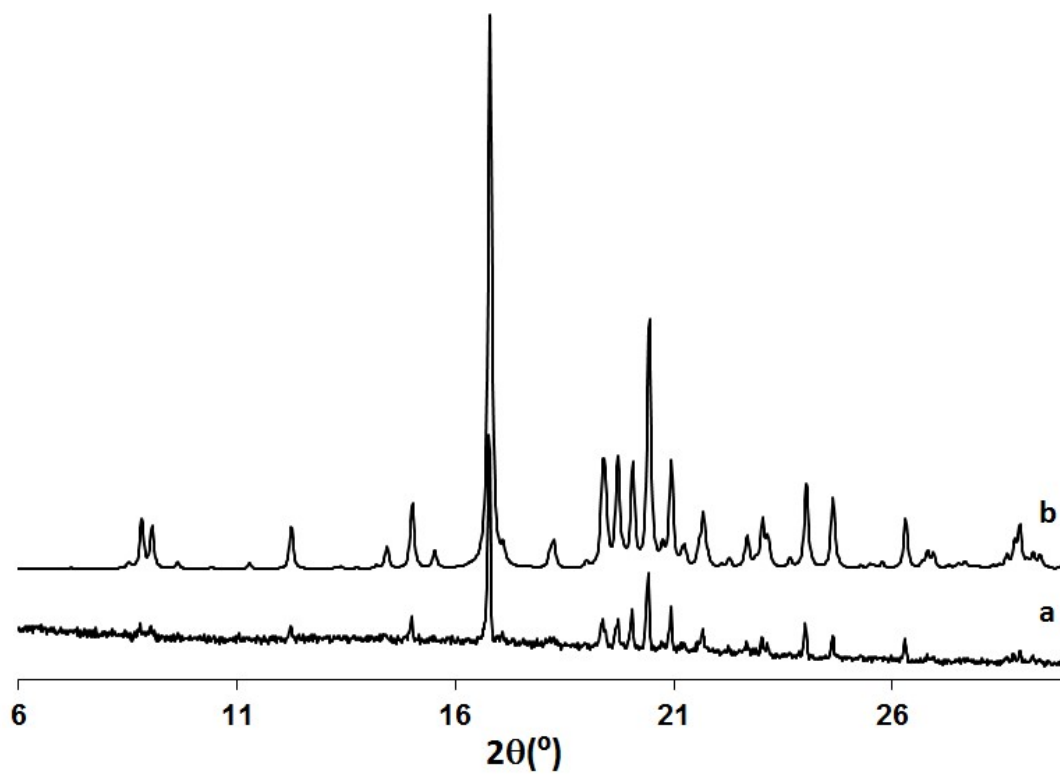

**Figure S6.** Powder XRD patterns for (a) DSC experiment stopped at 94 °C; (b) powder XRD simulated from single crystal data of  $\gamma$  polymorph.

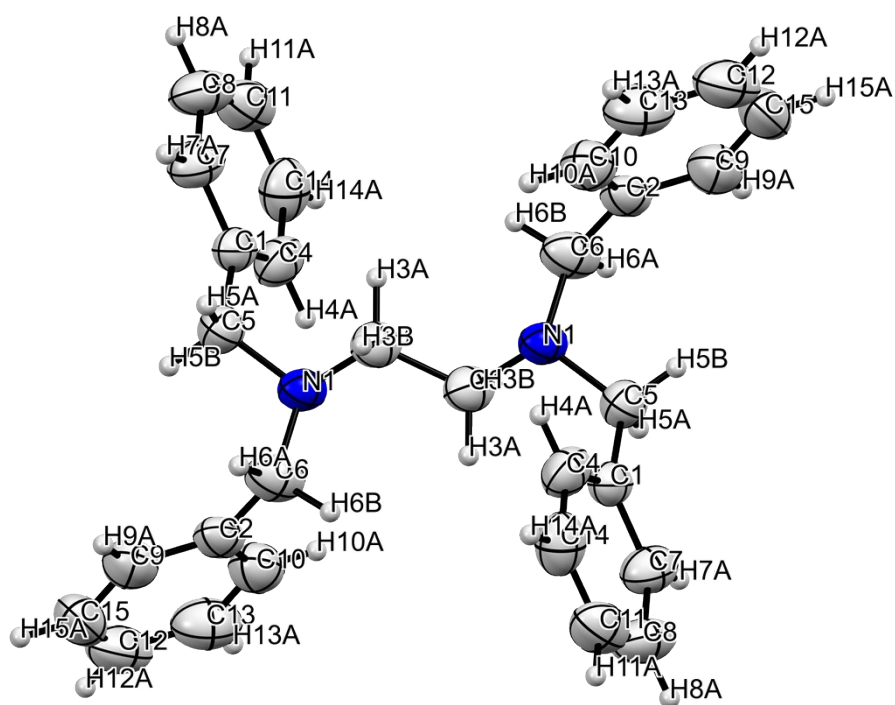

**Figure S7.** ORTEP diagram of the  $\beta$  phase.

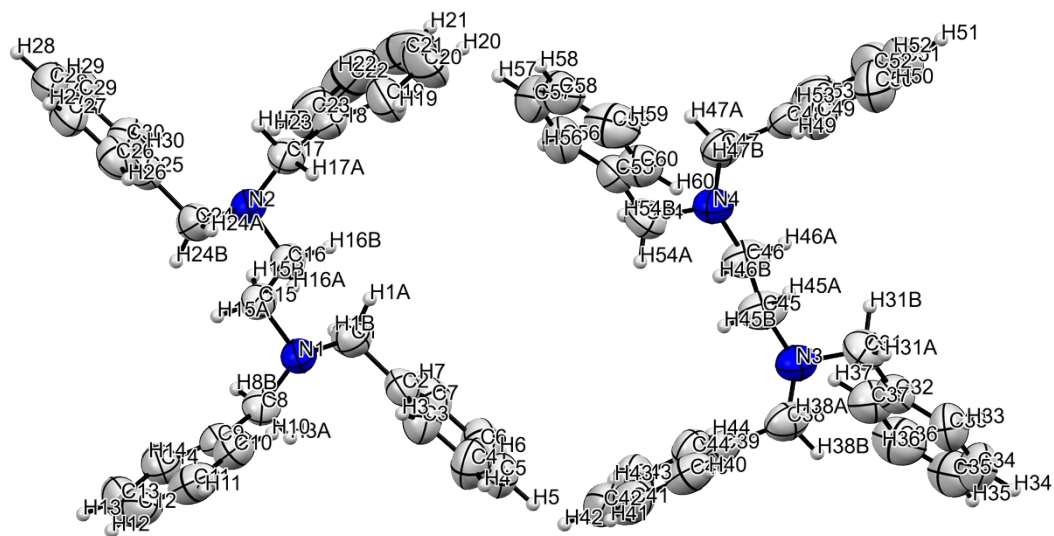

**Figure S8.** ORTEP diagram of the  $\gamma$  phase.

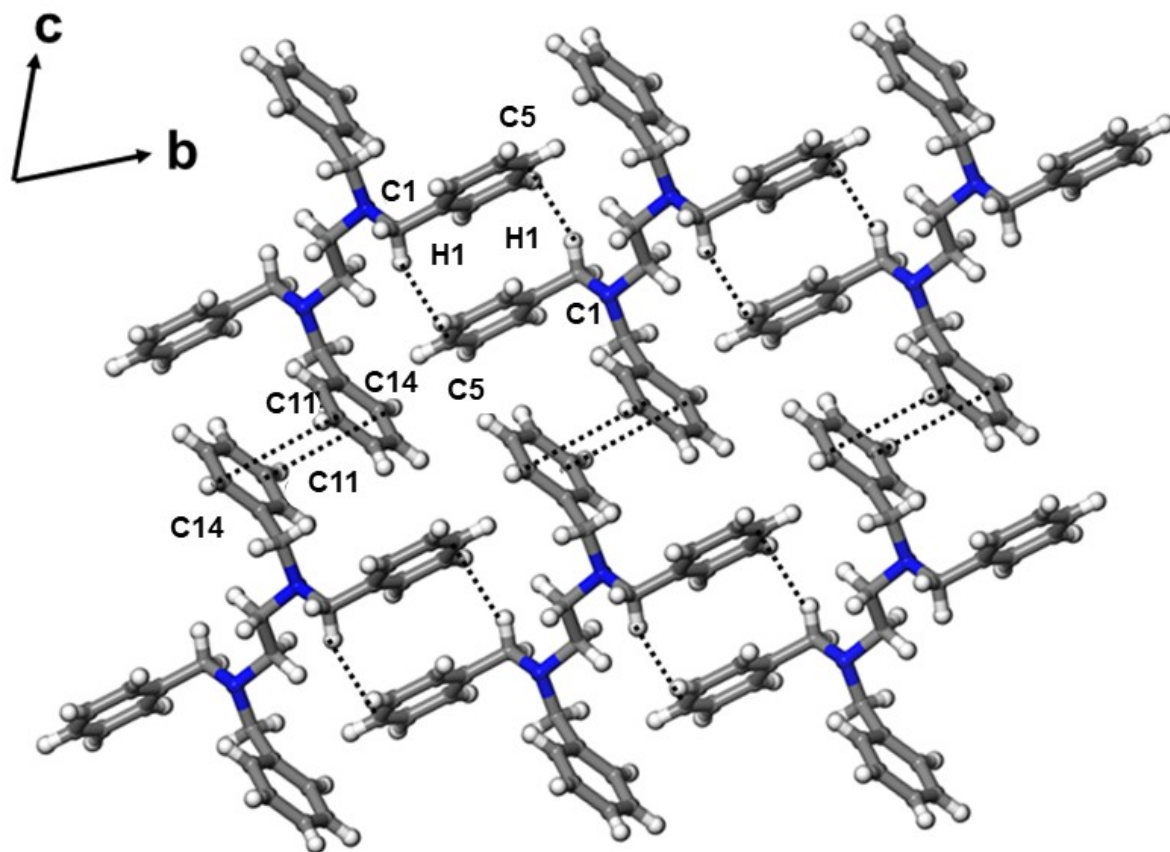

**Figure S9.** Electrostatic interactions in the  $\beta$  phase in dashed lines showed in Table S1.

**Table S1.** Electrostatic interactions shown in Figure S9 in the  $\beta$  polymorph.

| D-H $\cdots$ A                         | D-H( $\text{\AA}$ ) | H $\cdots$ A/ $\pi\cdots\pi$ ( $\text{\AA}$ ) | D $\cdots$ A( $\text{\AA}$ ) | D-H $\cdots$ A( $^\circ$ ) |
|----------------------------------------|---------------------|-----------------------------------------------|------------------------------|----------------------------|
| C1-H1 $\cdots$ C5                      | 0.97                | 2.85                                          | 3.63                         | 138                        |
| C14 $\cdots$ C11<br>( $\pi\cdots\pi$ ) |                     | 3.57                                          |                              |                            |

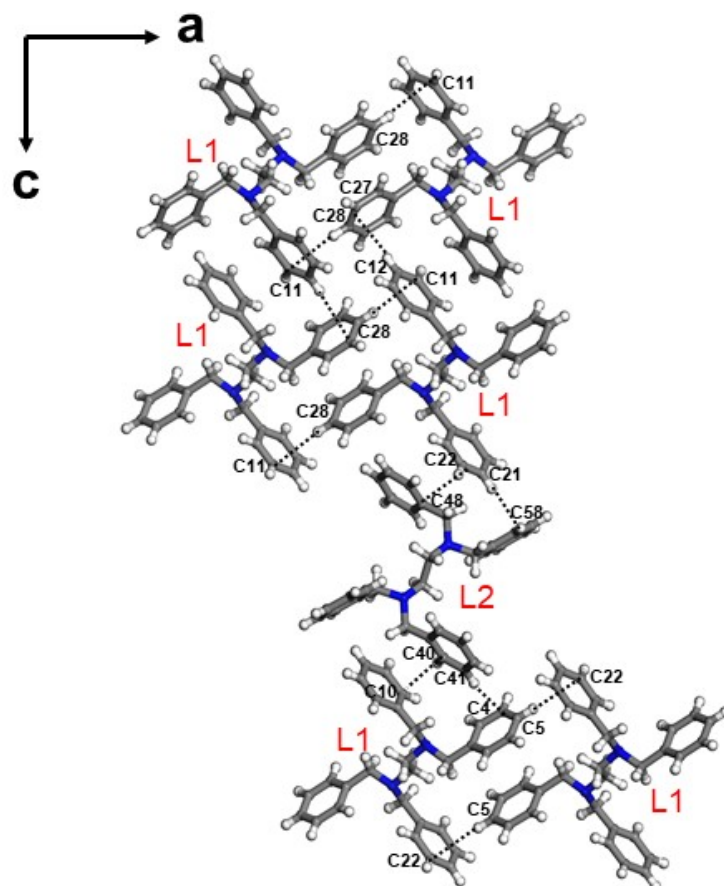

**Figure S10.** Electrostatic interactions in the  $\gamma$  phase in dashed lines showed in Table S2.

**Table S2.** Electrostatic interactions in the  $\gamma$  polymorph shown in Figure S10.

| D-H...A       | D-H(Å) | H...A (Å) | D...A(Å) | D-H...A(°) |
|---------------|--------|-----------|----------|------------|
| C28-H28...C11 | 0.93   | 2.94      | 3.63     | 138        |
| C12-H12...C27 | 0.93   | 2.98      | 4.08     | 175        |
| C22-H22...C48 | 0.93   | 3.09      | 3.95     | 154        |
| C21-H21...C58 | 0.93   | 2.82      | 3.75     | 176        |
| C40-H40...C10 | 0.93   | 3.12      | 3.98     | 154        |
| C41-H41...C4  | 0.93   | 2.98      | 3.87     | 160        |
| C5-H5...C22   | 0.93   | 3.02      | 3.95     | 174        |



## Density Functional Theory Calculations

Molecular modelling studies are performed in the crystalline phase, (*i.e.*, under periodical conditions). The GGA PBE functional<sup>1</sup> is adopted together with explicit van der Waals corrections<sup>2</sup> to improve the description of van der Waals interactions.<sup>3</sup> A numerical double zeta numerical basis set centered on atoms (including polarisation functions on all atoms), roughly comparable with the usual 6-31G\*\* gaussian basis, has been employed. The DMol<sup>3</sup> package<sup>4</sup> was employed for all the calculations. The geometries of the crystalline assemblies have been obtained from experimental X-ray determined structures and optimized by fixing the cells under symmetry restrain conditions.

## DFT optimized coordinates in $\alpha$ , $\beta$ and $\gamma$ -phases.

### Polymorph alpha:

```
REMARK  Materials Studio PDB file
REMARK  Created: Fri Aug 05 13:58:21 ora solare Europa occidentale 2022
CRYST1  5.872  10.202  10.629  97.62 101.62  93.95 P-1
ORIGX1   1.000000  0.000000  0.000000    0.000000
ORIGX2   0.000000  1.000000  0.000000    0.000000
ORIGX3   0.000000  0.000000  1.000000    0.000000
SCALE1   0.170306  0.011763  0.037208    0.000000
SCALE2   0.000000  0.098254  0.014899    0.000000
SCALE3   0.000000  0.000000  0.097149    0.000000
ATOM    1  N1  MOL    2    0.065  8.940  1.247  1.00  0.06    N
ATOM    2  C1  MOL    2   -0.043 10.157  0.399  1.00  0.07    C
ATOM    3  H1  MOL    2    0.808 10.249 -0.314  1.00  0.08    H
ATOM    4  H2  MOL    2    0.023 11.016  1.084  1.00  0.08    H
ATOM    5  C2  MOL    2    0.235  7.691  0.449  1.00  0.08    C
ATOM    6  H3  MOL    2    1.223  7.672 -0.069  1.00  0.10    H
ATOM    7  H4  MOL    2   -0.531  7.678 -0.338  1.00  0.10    H
ATOM    8  C3  MOL    2    0.086  6.433  1.289  1.00  0.06    C
```

|      |    |     |     |   |        |        |       |      |      |   |
|------|----|-----|-----|---|--------|--------|-------|------|------|---|
| ATOM | 9  | C4  | MOL | 2 | -1.091 | 6.198  | 2.022 | 1.00 | 0.08 | C |
| ATOM | 10 | H5  | MOL | 2 | -1.885 | 6.944  | 1.999 | 1.00 | 0.09 | H |
| ATOM | 11 | C5  | MOL | 2 | -1.237 | 5.025  | 2.778 | 1.00 | 0.09 | C |
| ATOM | 12 | H6  | MOL | 2 | -2.155 | 4.852  | 3.341 | 1.00 | 0.11 | H |
| ATOM | 13 | C6  | MOL | 2 | -0.209 | 4.072  | 2.803 | 1.00 | 0.10 | C |
| ATOM | 14 | H7  | MOL | 2 | -0.315 | 3.152  | 3.377 | 1.00 | 0.12 | H |
| ATOM | 15 | C7  | MOL | 2 | 0.970  | 4.300  | 2.079 | 1.00 | 0.10 | C |
| ATOM | 16 | H8  | MOL | 2 | 1.773  | 3.563  | 2.107 | 1.00 | 0.12 | H |
| ATOM | 17 | C8  | MOL | 2 | 1.113  | 5.478  | 1.327 | 1.00 | 0.08 | C |
| ATOM | 18 | H9  | MOL | 2 | 2.033  | 5.662  | 0.770 | 1.00 | 0.10 | H |
| ATOM | 19 | C9  | MOL | 2 | 1.140  | 9.040  | 2.275 | 1.00 | 0.07 | C |
| ATOM | 20 | H10 | MOL | 2 | 2.141  | 9.142  | 1.792 | 1.00 | 0.08 | H |
| ATOM | 21 | H11 | MOL | 2 | 1.148  | 8.078  | 2.810 | 1.00 | 0.08 | H |
| ATOM | 22 | C10 | MOL | 2 | 0.959  | 10.156 | 3.285 | 1.00 | 0.06 | C |
| ATOM | 23 | C11 | MOL | 2 | 1.998  | 11.083 | 3.498 | 1.00 | 0.07 | C |
| ATOM | 24 | H12 | MOL | 2 | 2.904  | 11.026 | 2.893 | 1.00 | 0.09 | H |
| ATOM | 25 | C12 | MOL | 2 | 1.899  | 12.050 | 4.508 | 1.00 | 0.09 | C |
| ATOM | 26 | H13 | MOL | 2 | 2.709  | 12.757 | 4.682 | 1.00 | 0.11 | H |
| ATOM | 27 | C13 | MOL | 2 | 0.751  | 12.114 | 5.312 | 1.00 | 0.09 | C |
| ATOM | 28 | H14 | MOL | 2 | 0.688  | 12.857 | 6.105 | 1.00 | 0.10 | H |
| ATOM | 29 | C14 | MOL | 2 | -0.304 | 11.208 | 5.094 | 1.00 | 0.08 | C |
| ATOM | 30 | H15 | MOL | 2 | -1.204 | 11.258 | 5.708 | 1.00 | 0.10 | H |
| ATOM | 31 | C15 | MOL | 2 | -0.201 | 10.239 | 4.085 | 1.00 | 0.07 | C |
| ATOM | 32 | H16 | MOL | 2 | -1.009 | 9.530  | 3.913 | 1.00 | 0.08 | H |
| TER  | 33 |     |     |   |        |        |       |      |      |   |

### Polymorph beta:

REMARK Materials Studio PDB file

REMARK Created: Fri Aug 05 13:59:01 ora solare Europa occidentale 2022

CRYST1 6.356 9.042 11.117 76.99 86.68 79.27 P-1

ORIGX1 1.000000 0.000000 0.000000 0.000000

ORIGX2 0.000000 1.000000 0.000000 0.000000

ORIGX3 0.000000 0.000000 1.000000 0.000000

|        |          |           |           |         |        |        |        |      |      |   |
|--------|----------|-----------|-----------|---------|--------|--------|--------|------|------|---|
| SCALE1 | 0.157332 | -0.029799 | -0.002692 | 0.00000 |        |        |        |      |      |   |
| SCALE2 | 0.000000 | 0.112561  | -0.025201 | 0.00000 |        |        |        |      |      |   |
| SCALE3 | 0.000000 | 0.000000  | 0.092334  | 0.00000 |        |        |        |      |      |   |
| ATOM   | 1        | N1        | MOL       | 2       | 2.389  | 1.017  | 1.425  | 1.00 | 0.05 | N |
| ATOM   | 2        | C1        | MOL       | 2       | 2.921  | 0.030  | 3.690  | 1.00 | 0.05 | C |
| ATOM   | 3        | C2        | MOL       | 2       | 1.274  | 3.265  | 1.397  | 1.00 | 0.05 | C |
| ATOM   | 4        | C3        | MOL       | 2       | 2.762  | -0.180 | 0.623  | 1.00 | 0.05 | C |
| ATOM   | 5        | H3A       | MOL       | 2       | 3.356  | -0.822 | 1.291  | 1.00 | 0.08 | H |
| ATOM   | 6        | H3B       | MOL       | 2       | 1.871  | -0.771 | 0.304  | 1.00 | 0.08 | H |
| ATOM   | 7        | C4        | MOL       | 2       | 4.195  | 0.611  | 3.823  | 1.00 | 0.06 | C |
| ATOM   | 8        | H4A       | MOL       | 2       | 4.429  | 1.498  | 3.235  | 1.00 | 0.07 | H |
| ATOM   | 9        | C5        | MOL       | 2       | 1.886  | 0.655  | 2.778  | 1.00 | 0.05 | C |
| ATOM   | 10       | H5A       | MOL       | 2       | 0.998  | -0.010 | 2.707  | 1.00 | 0.07 | H |
| ATOM   | 11       | H5B       | MOL       | 2       | 1.538  | 1.594  | 3.236  | 1.00 | 0.07 | H |
| ATOM   | 12       | C6        | MOL       | 2       | 1.408  | 1.905  | 0.736  | 1.00 | 0.06 | C |
| ATOM   | 13       | H6A       | MOL       | 2       | 0.408  | 1.418  | 0.686  | 1.00 | 0.08 | H |
| ATOM   | 14       | H6B       | MOL       | 2       | 1.741  | 2.056  | -0.298 | 1.00 | 0.08 | H |
| ATOM   | 15       | C7        | MOL       | 2       | 2.607  | -1.088 | 4.487  | 1.00 | 0.06 | C |
| ATOM   | 16       | H7A       | MOL       | 2       | 1.617  | -1.547 | 4.412  | 1.00 | 0.08 | H |
| ATOM   | 17       | C8        | MOL       | 2       | 3.542  | -1.608 | 5.394  | 1.00 | 0.08 | C |
| ATOM   | 18       | H8A       | MOL       | 2       | 3.275  | -2.465 | 6.012  | 1.00 | 0.09 | H |
| ATOM   | 19       | C9        | MOL       | 2       | 0.034  | 3.690  | 1.906  | 1.00 | 0.07 | C |
| ATOM   | 20       | H9A       | MOL       | 2       | -0.827 | 3.023  | 1.839  | 1.00 | 0.08 | H |
| ATOM   | 21       | C10       | MOL       | 2       | 2.377  | 4.135  | 1.459  | 1.00 | 0.07 | C |
| ATOM   | 22       | AH10      | MOL       | 2       | 3.334  | 3.809  | 1.051  | 1.00 | 0.08 | H |
| ATOM   | 23       | C11       | MOL       | 2       | 4.821  | -1.041 | 5.500  | 1.00 | 0.07 | C |
| ATOM   | 24       | AH11      | MOL       | 2       | 5.558  | -1.468 | 6.179  | 1.00 | 0.09 | H |
| ATOM   | 25       | C12       | MOL       | 2       | 0.998  | 5.828  | 2.536  | 1.00 | 0.08 | C |
| ATOM   | 26       | AH12      | MOL       | 2       | 0.889  | 6.818  | 2.979  | 1.00 | 0.10 | H |
| ATOM   | 27       | C13       | MOL       | 2       | 2.240  | 5.413  | 2.019  | 1.00 | 0.08 | C |
| ATOM   | 28       | AH13      | MOL       | 2       | 3.096  | 6.086  | 2.052  | 1.00 | 0.10 | H |
| ATOM   | 29       | C14       | MOL       | 2       | 5.135  | 0.080  | 4.714  | 1.00 | 0.07 | C |
| ATOM   | 30       | AH14      | MOL       | 2       | 6.119  | 0.540  | 4.796  | 1.00 | 0.08 | H |
| ATOM   | 31       | C15       | MOL       | 2       | -0.107 | 4.966  | 2.477  | 1.00 | 0.09 | C |

ATOM 32 AH15 MOL 2 -1.069 5.282 2.879 1.00 0.10 H  
TER 33

## Polymorph gamma:

REMARK Materials Studio PDB file

REMARK Created: Mon Aug 15 09:39:20 ora solare Europa occidentale 2022

CRYST1 39.091 12.916 20.068 90.00 93.66 90.00 C2/C

ORIGX1 1.000000 0.000000 0.000000 0.000000

ORIGX2 0.000000 1.000000 0.000000 0.000000

ORIGX3 0.000000 0.000000 1.000000 0.000000

SCALE1 0.025582 0.000000 0.001637 0.000000

SCALE2 0.000000 0.077423 0.000000 0.000000

SCALE3 0.000000 0.000000 0.049931 0.000000

|      |    |     |     |   |        |        |        |      |      |   |
|------|----|-----|-----|---|--------|--------|--------|------|------|---|
| ATOM | 1  | C1  | MOL | 2 | 26.384 | 9.887  | -0.314 | 1.00 | 0.08 | C |
| ATOM | 2  | H1A | MOL | 2 | 26.630 | 9.113  | 0.412  | 1.00 | 0.09 | H |
| ATOM | 3  | H1B | MOL | 2 | 26.107 | 10.788 | 0.253  | 1.00 | 0.09 | H |
| ATOM | 4  | C2  | MOL | 2 | 27.615 | 10.200 | -1.143 | 1.00 | 0.07 | C |
| ATOM | 5  | C3  | MOL | 2 | 27.994 | 9.387  | -2.225 | 1.00 | 0.09 | C |
| ATOM | 6  | H3  | MOL | 2 | 27.368 | 8.554  | -2.508 | 1.00 | 0.10 | H |
| ATOM | 7  | C4  | MOL | 2 | 29.171 | 9.657  | -2.934 | 1.00 | 0.11 | C |
| ATOM | 8  | H4  | MOL | 2 | 29.466 | 9.020  | -3.752 | 1.00 | 0.13 | H |
| ATOM | 9  | C5  | MOL | 2 | 29.974 | 10.756 | -2.589 | 1.00 | 0.11 | C |
| ATOM | 10 | H5  | MOL | 2 | 30.879 | 10.968 | -3.135 | 1.00 | 0.13 | H |
| ATOM | 11 | C6  | MOL | 2 | 29.589 | 11.581 | -1.525 | 1.00 | 0.10 | C |
| ATOM | 12 | H6  | MOL | 2 | 30.190 | 12.436 | -1.258 | 1.00 | 0.12 | H |
| ATOM | 13 | C7  | MOL | 2 | 28.421 | 11.299 | -0.806 | 1.00 | 0.08 | C |
| ATOM | 14 | H7  | MOL | 2 | 28.130 | 11.931 | 0.018  | 1.00 | 0.10 | H |
| ATOM | 15 | C8  | MOL | 2 | 24.669 | 10.516 | -1.948 | 1.00 | 0.07 | C |
| ATOM | 16 | H8A | MOL | 2 | 25.509 | 11.065 | -2.383 | 1.00 | 0.08 | H |
| ATOM | 17 | H8B | MOL | 2 | 24.115 | 11.221 | -1.313 | 1.00 | 0.08 | H |
| ATOM | 18 | C9  | MOL | 2 | 23.744 | 10.032 | -3.055 | 1.00 | 0.06 | C |
| ATOM | 19 | C10 | MOL | 2 | 23.964 | 8.815  | -3.724 | 1.00 | 0.08 | C |
| ATOM | 20 | H10 | MOL | 2 | 24.775 | 8.178  | -3.412 | 1.00 | 0.10 | H |

|      |    |      |     |   |        |        |        |      |      |   |
|------|----|------|-----|---|--------|--------|--------|------|------|---|
| ATOM | 21 | C11  | MOL | 2 | 23.128 | 8.429  | -4.787 | 1.00 | 0.10 | C |
| ATOM | 22 | H11  | MOL | 2 | 23.300 | 7.490  | -5.288 | 1.00 | 0.12 | H |
| ATOM | 23 | C12  | MOL | 2 | 22.073 | 9.260  | -5.196 | 1.00 | 0.11 | C |
| ATOM | 24 | H12  | MOL | 2 | 21.440 | 8.963  | -6.016 | 1.00 | 0.14 | H |
| ATOM | 25 | C13  | MOL | 2 | 21.845 | 10.470 | -4.527 | 1.00 | 0.11 | C |
| ATOM | 26 | H13  | MOL | 2 | 21.033 | 11.110 | -4.833 | 1.00 | 0.14 | H |
| ATOM | 27 | C14  | MOL | 2 | 22.671 | 10.850 | -3.459 | 1.00 | 0.09 | C |
| ATOM | 28 | H14  | MOL | 2 | 22.484 | 11.779 | -2.941 | 1.00 | 0.10 | H |
| ATOM | 29 | C15  | MOL | 2 | 24.187 | 8.791  | -0.259 | 1.00 | 0.07 | C |
| ATOM | 30 | AH15 | MOL | 2 | 23.245 | 8.791  | -0.804 | 1.00 | 0.08 | H |
| ATOM | 31 | BH15 | MOL | 2 | 24.041 | 9.374  | 0.662  | 1.00 | 0.08 | H |
| ATOM | 32 | C16  | MOL | 2 | 24.571 | 7.352  | 0.111  | 1.00 | 0.07 | C |
| ATOM | 33 | AH16 | MOL | 2 | 24.698 | 6.778  | -0.819 | 1.00 | 0.08 | H |
| ATOM | 34 | BH16 | MOL | 2 | 25.523 | 7.344  | 0.639  | 1.00 | 0.08 | H |
| ATOM | 35 | C17  | MOL | 2 | 24.143 | 5.594  | 1.768  | 1.00 | 0.07 | C |
| ATOM | 36 | AH17 | MOL | 2 | 24.714 | 4.931  | 1.103  | 1.00 | 0.08 | H |
| ATOM | 37 | BH17 | MOL | 2 | 23.323 | 5.003  | 2.183  | 1.00 | 0.08 | H |
| ATOM | 38 | C18  | MOL | 2 | 25.052 | 6.052  | 2.894  | 1.00 | 0.07 | C |
| ATOM | 39 | C19  | MOL | 2 | 26.142 | 5.247  | 3.272  | 1.00 | 0.12 | C |
| ATOM | 40 | H19  | MOL | 2 | 26.362 | 4.344  | 2.722  | 1.00 | 0.15 | H |
| ATOM | 41 | C20  | MOL | 2 | 26.945 | 5.612  | 4.363  | 1.00 | 0.20 | C |
| ATOM | 42 | H20  | MOL | 2 | 27.786 | 4.993  | 4.633  | 1.00 | 0.24 | H |
| ATOM | 43 | C21  | MOL | 2 | 26.662 | 6.771  | 5.098  | 1.00 | 0.21 | C |
| ATOM | 44 | H21  | MOL | 2 | 27.256 | 7.032  | 5.959  | 1.00 | 0.25 | H |
| ATOM | 45 | C22  | MOL | 2 | 25.597 | 7.592  | 4.699  | 1.00 | 0.18 | C |
| ATOM | 46 | H22  | MOL | 2 | 25.389 | 8.506  | 5.232  | 1.00 | 0.22 | H |
| ATOM | 47 | C23  | MOL | 2 | 24.797 | 7.236  | 3.603  | 1.00 | 0.11 | C |
| ATOM | 48 | H23  | MOL | 2 | 23.979 | 7.865  | 3.294  | 1.00 | 0.13 | H |
| ATOM | 49 | C24  | MOL | 2 | 22.373 | 6.257  | 0.205  | 1.00 | 0.07 | C |
| ATOM | 50 | AH24 | MOL | 2 | 22.628 | 5.369  | -0.392 | 1.00 | 0.09 | H |
| ATOM | 51 | BH24 | MOL | 2 | 22.106 | 7.049  | -0.493 | 1.00 | 0.09 | H |
| ATOM | 52 | C25  | MOL | 2 | 21.168 | 5.930  | 1.069  | 1.00 | 0.07 | C |
| ATOM | 53 | C26  | MOL | 2 | 20.353 | 4.835  | 0.740  | 1.00 | 0.08 | C |
| ATOM | 54 | H26  | MOL | 2 | 20.613 | 4.215  | -0.104 | 1.00 | 0.10 | H |

|      |    |      |     |   |        |       |        |      |      |   |
|------|----|------|-----|---|--------|-------|--------|------|------|---|
| ATOM | 55 | C27  | MOL | 2 | 19.212 | 4.539 | 1.497  | 1.00 | 0.10 | C |
| ATOM | 56 | H27  | MOL | 2 | 18.601 | 3.688 | 1.237  | 1.00 | 0.12 | H |
| ATOM | 57 | C28  | MOL | 2 | 18.865 | 5.348 | 2.589  | 1.00 | 0.11 | C |
| ATOM | 58 | H28  | MOL | 2 | 17.976 | 5.132 | 3.159  | 1.00 | 0.13 | H |
| ATOM | 59 | C29  | MOL | 2 | 19.684 | 6.435 | 2.931  | 1.00 | 0.10 | C |
| ATOM | 60 | H29  | MOL | 2 | 19.428 | 7.049 | 3.781  | 1.00 | 0.12 | H |
| ATOM | 61 | C30  | MOL | 2 | 20.830 | 6.724 | 2.179  | 1.00 | 0.08 | C |
| ATOM | 62 | H30  | MOL | 2 | 21.464 | 7.554 | 2.449  | 1.00 | 0.10 | H |
| ATOM | 63 | C31  | MOL | 2 | 36.734 | 5.295 | -0.976 | 1.00 | 0.09 | C |
| ATOM | 64 | AH31 | MOL | 2 | 37.149 | 4.369 | -1.398 | 1.00 | 0.11 | H |
| ATOM | 65 | BH31 | MOL | 2 | 36.751 | 5.197 | 0.109  | 1.00 | 0.11 | H |
| ATOM | 66 | C32  | MOL | 2 | 37.607 | 6.468 | -1.394 | 1.00 | 0.08 | C |
| ATOM | 67 | C33  | MOL | 2 | 38.814 | 6.261 | -2.082 | 1.00 | 0.11 | C |
| ATOM | 68 | H33  | MOL | 2 | 39.122 | 5.254 | -2.330 | 1.00 | 0.13 | H |
| ATOM | 69 | C34  | MOL | 2 | 39.618 | 7.353 | -2.452 | 1.00 | 0.13 | C |
| ATOM | 70 | H34  | MOL | 2 | 40.540 | 7.192 | -2.990 | 1.00 | 0.15 | H |
| ATOM | 71 | C35  | MOL | 2 | 39.220 | 8.658 | -2.134 | 1.00 | 0.12 | C |
| ATOM | 72 | H35  | MOL | 2 | 39.841 | 9.493 | -2.418 | 1.00 | 0.15 | H |
| ATOM | 73 | C36  | MOL | 2 | 38.011 | 8.870 | -1.452 | 1.00 | 0.12 | C |
| ATOM | 74 | H36  | MOL | 2 | 37.696 | 9.875 | -1.217 | 1.00 | 0.14 | H |
| ATOM | 75 | C37  | MOL | 2 | 37.214 | 7.782 | -1.085 | 1.00 | 0.09 | C |
| ATOM | 76 | H37  | MOL | 2 | 36.285 | 7.943 | -0.564 | 1.00 | 0.11 | H |
| ATOM | 77 | C38  | MOL | 2 | 35.210 | 5.293 | -2.892 | 1.00 | 0.08 | C |
| ATOM | 78 | AH38 | MOL | 2 | 35.260 | 4.226 | -3.140 | 1.00 | 0.10 | H |
| ATOM | 79 | BH38 | MOL | 2 | 36.069 | 5.775 | -3.361 | 1.00 | 0.10 | H |
| ATOM | 80 | C39  | MOL | 2 | 33.928 | 5.876 | -3.454 | 1.00 | 0.07 | C |
| ATOM | 81 | C40  | MOL | 2 | 33.204 | 5.199 | -4.451 | 1.00 | 0.10 | C |
| ATOM | 82 | H40  | MOL | 2 | 33.521 | 4.216 | -4.769 | 1.00 | 0.12 | H |
| ATOM | 83 | C41  | MOL | 2 | 32.073 | 5.792 | -5.037 | 1.00 | 0.12 | C |
| ATOM | 84 | H41  | MOL | 2 | 31.533 | 5.271 | -5.809 | 1.00 | 0.15 | H |
| ATOM | 85 | C42  | MOL | 2 | 31.652 | 7.059 | -4.614 | 1.00 | 0.13 | C |
| ATOM | 86 | H42  | MOL | 2 | 30.787 | 7.515 | -5.067 | 1.00 | 0.15 | H |
| ATOM | 87 | C43  | MOL | 2 | 32.355 | 7.728 | -3.603 | 1.00 | 0.11 | C |
| ATOM | 88 | H43  | MOL | 2 | 32.026 | 8.696 | -3.258 | 1.00 | 0.14 | H |

|      |     |      |     |   |        |        |        |      |      |   |
|------|-----|------|-----|---|--------|--------|--------|------|------|---|
| ATOM | 89  | C44  | MOL | 2 | 33.491 | 7.142  | -3.033 | 1.00 | 0.09 | C |
| ATOM | 90  | H44  | MOL | 2 | 34.047 | 7.657  | -2.266 | 1.00 | 0.11 | H |
| ATOM | 91  | C45  | MOL | 2 | 34.370 | 4.593  | -0.699 | 1.00 | 0.08 | C |
| ATOM | 92  | AH45 | MOL | 2 | 34.809 | 3.599  | -0.558 | 1.00 | 0.10 | H |
| ATOM | 93  | BH45 | MOL | 2 | 33.481 | 4.480  | -1.315 | 1.00 | 0.10 | H |
| ATOM | 94  | C46  | MOL | 2 | 33.977 | 5.156  | 0.673  | 1.00 | 0.08 | C |
| ATOM | 95  | AH46 | MOL | 2 | 34.868 | 5.278  | 1.286  | 1.00 | 0.10 | H |
| ATOM | 96  | BH46 | MOL | 2 | 33.525 | 6.147  | 0.540  | 1.00 | 0.10 | H |
| ATOM | 97  | C47  | MOL | 2 | 33.118 | 4.437  | 2.859  | 1.00 | 0.08 | C |
| ATOM | 98  | AH47 | MOL | 2 | 32.258 | 3.939  | 3.308  | 1.00 | 0.09 | H |
| ATOM | 99  | BH47 | MOL | 2 | 33.040 | 5.503  | 3.107  | 1.00 | 0.09 | H |
| ATOM | 100 | C48  | MOL | 2 | 34.403 | 3.889  | 3.451  | 1.00 | 0.07 | C |
| ATOM | 101 | C49  | MOL | 2 | 34.896 | 2.633  | 3.063  | 1.00 | 0.09 | C |
| ATOM | 102 | H49  | MOL | 2 | 34.389 | 2.089  | 2.282  | 1.00 | 0.11 | H |
| ATOM | 103 | C50  | MOL | 2 | 36.031 | 2.093  | 3.686  | 1.00 | 0.13 | C |
| ATOM | 104 | H50  | MOL | 2 | 36.406 | 1.129  | 3.375  | 1.00 | 0.16 | H |
| ATOM | 105 | C51  | MOL | 2 | 36.677 | 2.807  | 4.708  | 1.00 | 0.15 | C |
| ATOM | 106 | H51  | MOL | 2 | 37.530 | 2.385  | 5.216  | 1.00 | 0.18 | H |
| ATOM | 107 | C52  | MOL | 2 | 36.216 | 4.078  | 5.069  | 1.00 | 0.15 | C |
| ATOM | 108 | H52  | MOL | 2 | 36.731 | 4.642  | 5.830  | 1.00 | 0.18 | H |
| ATOM | 109 | C53  | MOL | 2 | 35.083 | 4.617  | 4.441  | 1.00 | 0.10 | C |
| ATOM | 110 | H53  | MOL | 2 | 34.729 | 5.598  | 4.715  | 1.00 | 0.13 | H |
| ATOM | 111 | C54  | MOL | 2 | 31.629 | 4.401  | 0.916  | 1.00 | 0.09 | C |
| ATOM | 112 | AH54 | MOL | 2 | 31.629 | 4.495  | -0.170 | 1.00 | 0.11 | H |
| ATOM | 113 | BH54 | MOL | 2 | 31.189 | 5.320  | 1.326  | 1.00 | 0.11 | H |
| ATOM | 114 | C55  | MOL | 2 | 30.768 | 3.216  | 1.315  | 1.00 | 0.08 | C |
| ATOM | 115 | C56  | MOL | 2 | 29.558 | 3.405  | 2.005  | 1.00 | 0.11 | C |
| ATOM | 116 | H56  | MOL | 2 | 29.243 | 4.406  | 2.264  | 1.00 | 0.13 | H |
| ATOM | 117 | C57  | MOL | 2 | 28.761 | 2.304  | 2.358  | 1.00 | 0.13 | C |
| ATOM | 118 | H57  | MOL | 2 | 27.841 | 2.451  | 2.902  | 1.00 | 0.15 | H |
| ATOM | 119 | C58  | MOL | 2 | 29.161 | 1.007  | 2.011  | 1.00 | 0.13 | C |
| ATOM | 120 | H58  | MOL | 2 | 28.541 | 0.164  | 2.271  | 1.00 | 0.15 | H |
| ATOM | 121 | C59  | MOL | 2 | 30.373 | 0.810  | 1.331  | 1.00 | 0.12 | C |
| ATOM | 122 | H59  | MOL | 2 | 30.692 | -0.190 | 1.079  | 1.00 | 0.14 | H |

|      |     |     |     |   |        |       |        |      |      |   |
|------|-----|-----|-----|---|--------|-------|--------|------|------|---|
| ATOM | 123 | C60 | MOL | 2 | 31.169 | 1.909 | 0.988  | 1.00 | 0.09 | C |
| ATOM | 124 | H60 | MOL | 2 | 32.102 | 1.761 | 0.470  | 1.00 | 0.11 | H |
| ATOM | 125 | N1  | MOL | 2 | 25.229 | 9.413 | -1.124 | 1.00 | 0.06 | N |
| ATOM | 126 | N2  | MOL | 2 | 23.552 | 6.711 | 0.987  | 1.00 | 0.06 | N |
| ATOM | 127 | N3  | MOL | 2 | 35.322 | 5.488 | -1.418 | 1.00 | 0.07 | N |
| ATOM | 128 | N4  | MOL | 2 | 33.040 | 4.242 | 1.383  | 1.00 | 0.07 | N |
| TER  | 129 |     |     |   |        |       |        |      |      |   |

## References

<sup>1</sup> a) Perdew, J. P.; Burke, K.; Ernzerhof, M. E. Generalized Gradient Approximation Made Simple. *Phys. Rev. Lett.*, **1996**, *77*, 3865–3868; b) Perdew, J. P.; Burke, K.; Ernzerhof, M. E. Generalized Gradient Approximation Made Simple. *Phys. Rev. Lett.*, **1997**, *78*, 1396–1396.

<sup>2</sup> Grimme, S. Semiempirical hybrid density functional with perturbative second-order correlation. *J. Chem. Phys.*, **2006**, *124*, 34108.

<sup>3</sup> a) Baggioli, A.; Meille, S. V.; Raos, G.; Po, R.; Brinkmann, M. Famulari, A. Intramolecular CH/ $\pi$  interactions in alkylaromatics: Monomer conformations for poly(3-alkylthiophene) atomistic models. *Int. J. Quantum Chem.*, **2013**, *113*, 2154; b) Baggioli, A.; Famulari, A. On the inter-ring torsion potential of regioregular P3HT: a first principles reexamination with explicit side chains. *Phys. Chem. Chem. Phys.*, **2014**, *16*, 3983.

<sup>4</sup> Delley, B. From molecules to solids with the DMol<sup>3</sup> approach. *J. Chem. Phys.*, **2000**, *113*, 7756.
